# Supplementary material for: Different Sensitivity of Flower-Visiting Diptera to a Neonicotinoid Insecticide: Expanding the Base for a Multiple-Species Risk Assessment Approach
Source: MDPI journal article supplement (doi:10.3390/insects15050317), 2024-04-29
Supplement: s1 [file s1]

## Supplementary material

### Sensitivity of flower-visiting Diptera to a neonicotinoid insecticide: expanding the base for a multiple-species risk assessment approach

Cátia Ariana Henriques Martins<sup>1</sup>, Celeste Azpiazu<sup>2,3</sup>, Jordi Bosch<sup>2</sup>, Giovanni Burgio<sup>1</sup>, Maria Luisa Dindo<sup>1</sup>, Santolo Francati<sup>1</sup>, Daniele Sommaggio<sup>1</sup>, Fabio Sgolastra<sup>1\*</sup>

<sup>1</sup>University of Bologna – Department of Agricultural and Food Science

<sup>2</sup>CREAF, Universitat Autònoma de Barcelona, E08193 Bellaterra, Spain

<sup>3</sup>Universidad Politécnica de Madrid, 28040 Madrid, Spain

\*Corresponding author: [fabio.sgolastra2@unibo.it](mailto:fabio.sgolastra2@unibo.it)

Figure S1. Boxplots of fresh weight for the three fly species.

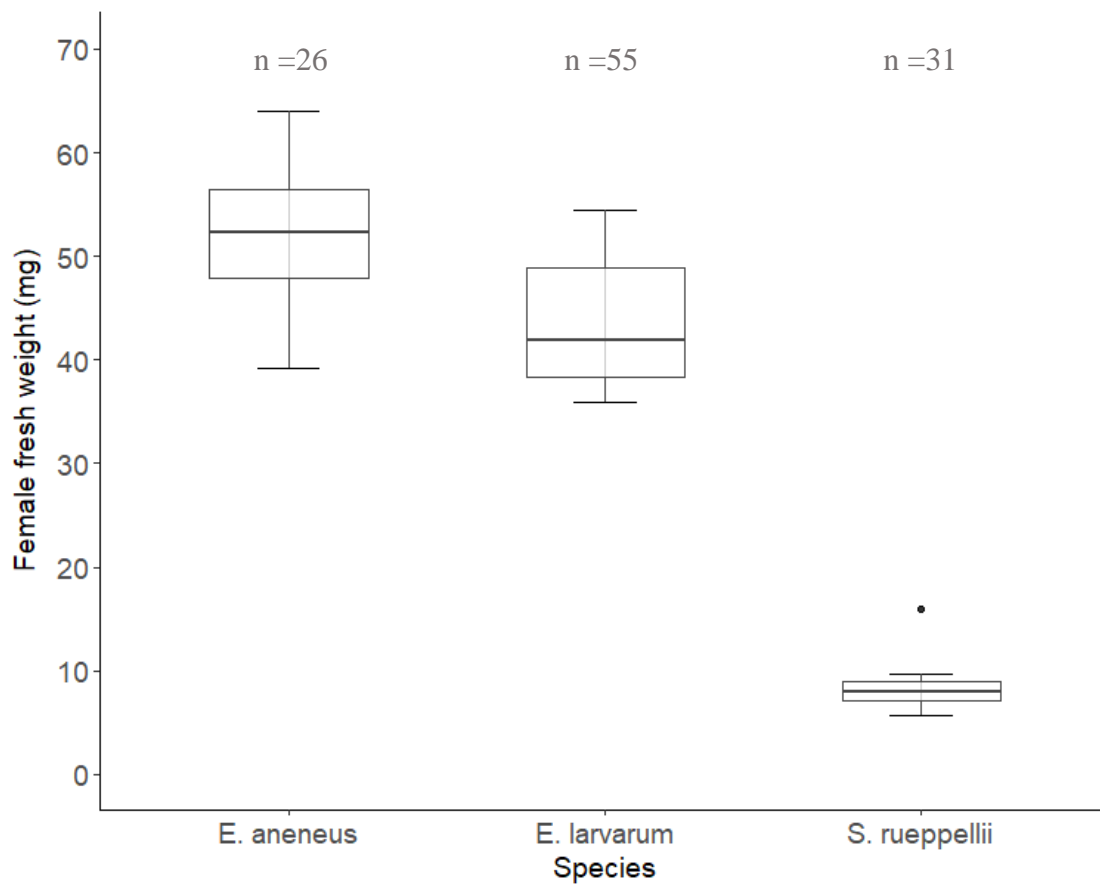

Table S1. Toxicity data used to build the Sensitivity Species Distribution (SSD) curve. LD<sub>50</sub> values: median lethal dose of imidacloprid at 48h. Where no weight standardization was performed in the original study, we indicate the reference for the mean weight used to transform the data.

| Species                         | Family        | Mean fresh weight (mg) | Contact LD50 (ng/insect) | Contact LD50 (µg/g insect) | Formulation <sup>1</sup> | Reference  |
|---------------------------------|---------------|------------------------|--------------------------|----------------------------|--------------------------|------------|
| <b>Flies (Diptera)</b>          |               |                        |                          |                            |                          |            |
| <i>Exorista larvarum</i>        | Tachinidae    | 40.1                   | 467.5                    | 11.7                       | c.f.                     | This study |
| <i>Sphaerophoria rueppellii</i> | Syrphidae     | 7.9                    | 10.2                     | 1.35                       | c.f.                     | This study |
| <i>Eristalinus aeneus</i>       | Syrphidae     | 52.7                   | 18176.2                  | 344.8                      | c.f.                     | This study |
| <b>Bees (Hymenoptera)</b>       |               |                        |                          |                            |                          |            |
| <i>Apis mellifera</i>           | Apidae        | 100a                   | 6.7                      | 0.07                       | a.i.                     | [1]        |
| <i>Apis mellifera</i>           | Apidae        | 100a                   | 24.3                     | 0.24                       | a.i.                     | [1]        |
| <i>Apis mellifera</i>           | Apidae        | 100a                   | 81                       | 0.81                       | a.i.                     | [2]        |
| <i>Apis mellifera</i>           | Apidae        | 100a                   | 42                       | 0.42                       | c.f.                     | [2]        |
| <i>Apis mellifera</i>           | Apidae        | 100a                   | 245                      | 2.45                       | a.i.                     | [3]        |
| <i>Apis mellifera</i>           | Apidae        | 112                    | 234                      | 2.09                       | a.i.                     | [4]        |
| <i>Apis mellifera</i>           | Apidae        | 100a                   | 150                      | 1.5                        | c.f.                     | [5]        |
| <i>Apis mellifera</i>           | Apidae        | 100a                   | 60                       | 0.6                        | a.i.                     | [6]        |
| <i>Apis cerana</i>              | Apidae        | 75b                    | 3.6                      | 0.05                       | a.i.                     | [7]        |
| <i>Bombus terrestris</i>        | Apidae        | 200c                   | 14                       | 0.07                       | a.i.                     | [8]        |
| <i>Bombus terrestris</i>        | Apidae        | 200c                   | 77                       | 0.39                       | c.f.                     | [8]        |
| <i>Scaptotrigona postica</i>    | Apidae        | 18d                    | 24.5                     | 1.36                       | a.i.                     | [9]        |
| <i>Melipona scutellaris</i>     | Apidae        | 100e                   | 1.29                     | 0.013                      | a.i.                     | [10]       |
| <i>Leioproctus paahaumaa</i>    | Colletidae    | 52.4                   | 1.21                     | 0.0231                     | a.i.                     | [4]        |
| <i>Osmia bicornis</i>           | Megachilidae  | 94.6f                  | 30                       | 0.33                       | a.i.                     | [3]        |
| <i>Osmia bicornis</i>           | Megachilidae  | 94.6f                  | 46                       | 0.49                       | a.i.                     | [11]       |
| <i>Osmia cornifrons</i>         | Megachilidae  | 131g                   | 3820                     | 29.16                      | c.f.                     | [5]        |
| <i>Osmia cornifrons</i>         | Megachilidae  | 100-110                | -                        | 0.023                      | a.i.                     | [12]       |
| <b>Beetles (Coleoptera)</b>     |               |                        |                          |                            |                          |            |
| <i>Harmonia axyridis</i>        | Coccinellidae | 37.5g                  | 360                      | 9.60                       | c.f.                     | [13]       |
| <i>Coleomegilla maculata</i>    | Coccinellidae | 14.2g                  | 74                       | 5.21                       | c.f.                     | [14]       |

<sup>1</sup> a.i.: active ingredient, c.f.: commercial formulation

- a. Mean weight from [15]
- b. Mean weight from [16]
- c. Mean weight from [17]
- d. Mean weight from [18]
- e. Attributed the same weight as honey bee *Apis mellifera* L.[19]
- f. Mean weight from [3]
- g. [20]

Table S2. Species sensitivity ratio (R). Values in bold exceed the range of 10-fold safety factor from the endpoint of *A. mellifera*, recommended by [2].

| Species                         | R<br>(ng/insect) | R<br>(µg/g insect) |
|---------------------------------|------------------|--------------------|
| <i>Exorista larvarum</i>        | 0.14             | 0.05               |
| <i>Sphaerophoria rueppellii</i> | 6.27             | 0.47               |
| <i>Eristalinus aeneus</i>       | 0.00             | 0.00               |
| <i>Apis cerana</i>              | <b>17.81</b>     | <b>12.69</b>       |
| <i>Bombus terrestris</i>        | 1.95             | 3.84               |
| <i>Scaptotrigona postica</i>    | 2.62             | 0.47               |
| <i>Melipona scutellaris</i>     | <b>49.71</b>     | <b>49.20</b>       |
| <i>Leioproctus paahaumaa</i>    | <b>52.99</b>     | <b>27.48</b>       |
| <i>Osmia bicornis</i>           | 1.73             | 1.58               |
| <i>Osmia cornifrons</i>         | 0.02             | 0.78               |
| <i>Harmonia axyridis</i>        | 0.18             | 0.07               |
| <i>Coleomegilla maculata</i>    | 0.87             | 0.12               |

Figure S2. Fitted dose-response curves in (A) *Exorista larvarum* (L.), (B) *Sphaerophoria rueppellii* (Wiedemann) (Diptera: Syrphidae) and (C) *Eristalinus aeneus* (Scopoli) (Diptera: Syrphidae)

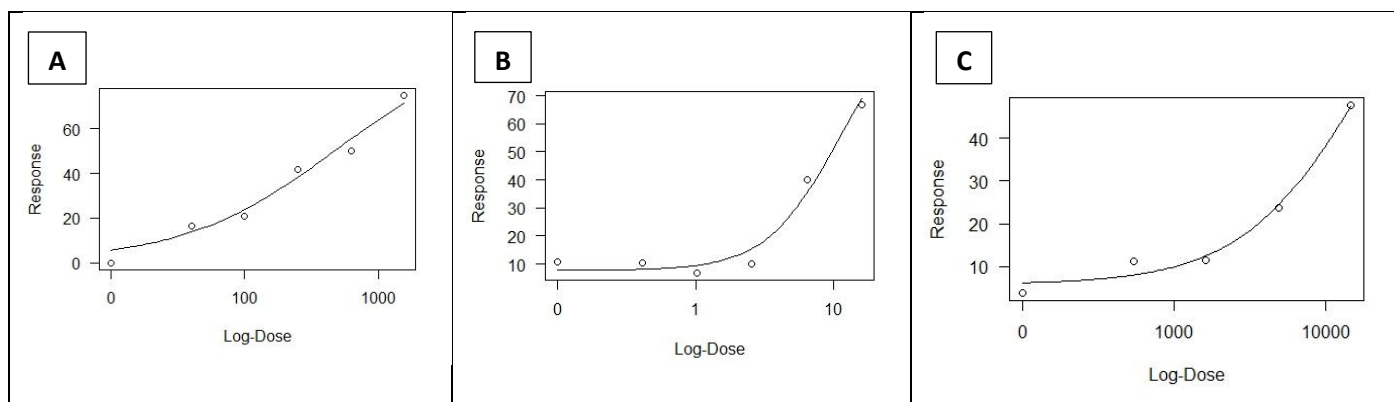

## References

- Suchail, S.; Guez, D.; Belzunces, L.P. Characteristics of Imidacloprid Toxicity in Two *Apis Mellifera* Subspecies. *Environ. Toxicol. Chem.* **2000**, *19*, 1901–1905, doi:10.1002/etc.5620190726.
- EFSA Guidance on the Risk Assessment of Plant Protection Products on Bees (*Apis Mellifera*, *Bombus* Spp. and Solitary Bees). *EFSA J.* **2013**, *11*, 3295, doi:10.2903/j.efsa.2013.3295.
- Uhl, P.; Awanbor, O.; Schulz, R.S.; Brühl, C.A. *Osmia Bicornis* Is Rarely an Adequate Regulatory Surrogate Species. Comparing Its Acute Sensitivity towards Multiple Insecticides with Regulatory *Apis Mellifera* Endpoints. *PLoS One* **2019**, *14*, e0201081, doi:10.1101/366237.
- Kueh Tai, F.; Pattemore, D.E.; Jochym, M.; Beggs, J.R.; Northcott, G.L.; Mortensen, A.N. Honey Bee Toxicological Responses Do Not Accurately Predict Environmental Risk of Imidacloprid to a Solitary Ground-Nesting Bee Species. *Sci. Total Environ.* **2022**, *839*, 156398, doi:10.1016/j.scitotenv.2022.156398.
- Biddinger, D.J.; Robertson, J.L.; Mullin, C.; Frazier, J.; Ashcraft, S.A.; Rajotte, E.G.; Joshi, N.K.; Vaughn, M. Comparative Toxicities and Synergism of Apple Orchard Pesticides to *Apis Mellifera* (L.) and *Osmia Cornifrons* (Radoszkowski). *PLoS One* **2013**, *8*, e72587, doi:10.1371/journal.pone.0072587.
- ECOTOX Curated Toxicity Data Were Retrieved from the ECOTOXicology Knowledgebase. U.S. Environmental Protection Agency Available online: <http://www.epa.gov/ecotox/> (accessed on 1 November 2022).
- Yasuda, M.; Sakamoto, Y.; Goka, K.; Nagamitsu, T.; Taki, H. Insecticide Susceptibility in Asian Honey Bees (*Apis Cerana* (Hymenoptera: Apidae)) and Implications for Wild Honey Bees in Asia. *J. Econ. Entomol.* **2017**, *110*, 447–452, doi:10.1093/jee/tox032.
- Bortolotti, L.; Porrini, C.; Sbrenna, G. Effetti Dell'imidacloprid Nei Confronti Di *Bombus Terrestris* (L.). Prove Di Laboratorio. *Inf. Fitopatol.* **2002**, *3*, 66–71.
- Soares, H.M.; Jacob, C.R.O.; Carvalho, S.M.; Nocelli, R.C.F.; Malaspina, O. Toxicity of Imidacloprid to the Stingless Bee *Scaptotrigona Postica* Latreille, 1807 (Hymenoptera: Apidae). *Bull. Environ. Contam. Toxicol.* **2015**, *94*, 675–680, doi:10.1007/s00128-015-1488-6.
- da Costa, L.M.; Grella, T.C.; Barbosa, R.A.; Malaspina, O.; Nocelli, R.C.F. Determination of Acute Lethal Doses (LD50 and LC50) of Imidacloprid for the Native Bee *Melipona Scutellaris* Latreille, 1811 (Hymenoptera: Apidae). *Sociobiology* **2015**, *62*, doi:10.13102/sociobiology.v62i4.792.
- Beadle, K.; Singh, K.S.; Troczka, B.J.; Randall, E.; Zaworra, M.; Zimmer, C.T.; Hayward, A.; Reid, R.; Kor, L.; Kohler, M.; et al. Genomic Insights into Neonicotinoid Sensitivity in the Solitary Bee *Osmia Bicornis*. *PLOS Genet.* **2019**, *15*, e1007903, doi:10.1371/journal.pgen.1007903.
- Phan, N.T.; Joshi, N.K.; Rajotte, E.G.; López-Urbe, M.M.; Zhu, F.; Biddinger, D.J. A New Ingestion Bioassay Protocol for Assessing Pesticide Toxicity to the Adult Japanese Orchard Bee (*Osmia Cornifrons*). *Sci. Rep.* **2020**, *10*, 9517, doi:10.1038/s41598-020-66118-2.
- Youn, Y.N.; Seo, M.J.; Shin, J.G.; Jang, C.; Yu, Y.M. Toxicity of Greenhouse Pesticides to Multicolored Asian Lady Beetles, *Harmonia Axyridis* (Coleoptera: Coccinellidae). *Biol. Control* **2003**, *28*, 164–170, doi:10.1016/S1049-9644(03)00098-7.
- Lucas, É.; Giroux, S.; Demougeot, S.; Duchesne, R. -M.; Coderre, D. Compatibility of a Natural Enemy, *Coleomegilla Maculata* Lengi (Col., Coccinellidae) and Four Insecticides Used against the Colorado Potato Beetle (Col., Chrysomelidae). *J. Appl. Entomol.* **2004**, *128*, 233–239, doi:10.1111/j.1439-0418.2004.00843.x.
- Suchail, S.; Debrauwer, L.; Belzunces, L.P. Metabolism of Imidacloprid in *Apis Mellifera*. *Pest Manag. Sci.* **2004**, *60*, 291–296, doi:10.1002/ps.772.
- Thompson, H. Extrapolation of Acute Toxicity across Bee Species. *Integr. Environ. Assess. Manag.* **2016**, *12*, 622–626, doi:10.1002/ieam.1737.
- Hagen, M.; Wikelski, M.; Kissling, W.D. Space Use of Bumblebees (*Bombus* Spp.) Revealed by Radio-Tracking. *PLoS One* **2011**, *6*, e19997, doi:10.1371/journal.pone.0019997.
- Hartfelder, K.; Engels, W. Allometric and Multivariate Analysis of Sex and Caste Polymorphism in the Neotropical Stingless Bee, *Scaptotrigona Postica*. *Insectes Soc.* **1992**, *39*, 251–266, doi:10.1007/BF01323946.
- Lourenço, C.T.; Carvalho, S.M.; Malaspina, O.; Nocelli, R.C.F. Oral Toxicity of Fipronil Insecticide Against the Stingless Bee *Melipona Scutellaris* (Latreille, 1811). *Bull. Environ. Contam. Toxicol.* **2012**, *89*, 921–924, doi:10.1007/s00128-012-0773-x.
- Hätönen, M.; Kantner, C.; Lopez Losada, R.; Ludwig, N.; Benavent González, A.; Riedhammer, C.; Kunz, P.; Panico, S.C.; Laakkonen, E.; Parramon Dolcet, L.; et al. *European Arthropods and Their Role in Pollination: Scientific Report of Their Biodiversity, Ecology and Sensitivity to Biocides*; European Chemicals Agency: Helsinki, Finland, 2022; ISBN 978-92-9468-131-7.
